1                   **Primary souring: a novel bacteria-free method for sour beer production**

2   Kara Osburn<sup>a</sup>, Justin Amaral<sup>b</sup>, Sara R. Metcal<sup>fa</sup>, David M. Nickens<sup>a</sup>, Cody M. Rogers<sup>a</sup>,  
3   Christopher Sausen<sup>a</sup>, Robert Caputo<sup>c</sup>, Justin Miller<sup>c</sup>, Hongde Li<sup>d</sup>, Jason M. Tennesen<sup>d</sup>, and  
4   Matthew L. Bochman<sup>a,c\*</sup>

5   <sup>a</sup>Molecular and Cellular Biochemistry Department, 212 South Hawthorne Drive, Simon Hall  
6   MSB1, room 405B, Indiana University, Bloomington, IN 47405, USA.

7   [klosburn@umail.iu.edu](mailto:klosburn@umail.iu.edu)

8   [srmetcal@indiana.edu](mailto:srmetcal@indiana.edu)

9   [dnickens@indiana.edu](mailto:dnickens@indiana.edu)

10   [codroger@indiana.edu](mailto:codroger@indiana.edu)

11   [csausen@indiana.edu](mailto:csausen@indiana.edu)

12   [bochman@indiana.edu](mailto:bochman@indiana.edu)

13

14   <sup>b</sup>Mainiacal Brewing Company, Bangor, ME 04401, USA.

15   [jamaral@mainiacalbrewingcompany.com](mailto:jamaral@mainiacalbrewingcompany.com)

16

17   <sup>c</sup>Wild Pitch Yeast, Bloomington, IN 47405, USA.

18   [rob@drinkin.beer](mailto:rob@drinkin.beer)

19   [justin@blackacrebrewing.com](mailto:justin@blackacrebrewing.com)

20

21   <sup>d</sup>Department of Biology, Indiana University, 1001 East Third Street, Bloomington, IN 47405,  
22   USA.

23   [hongde.li@hotmail.com](mailto:hongde.li@hotmail.com)

24   [jtenness@indiana.edu](mailto:jtenness@indiana.edu)

25

26   **\*Corresponding author:**

27   Matthew L. Bochman, Ph.D.

28   Assistant Professor

29   Molecular and Cellular Biochemistry Department

30   212 South Hawthorne Drive

31   Simon Hall MSB1, room 405B

32   Indiana University

33   [bochman@indiana.edu](mailto:bochman@indiana.edu)

34   812-856-2095

## 35 **Abstract**

36 In the beverage fermentation industry, especially at the craft or micro level, there is a movement  
37 to incorporate as many local ingredients as possible to both capture terroir and stimulate local  
38 economies. In the case of craft beer, this has traditionally only encompassed locally sourced  
39 barley, hops, and other agricultural adjuncts. The identification and use of novel yeasts in  
40 brewing lags behind. We sought to bridge this gap by bio-prospecting for wild yeasts, with a  
41 focus on the American Midwest. We isolated 284 different strains from 54 species of yeast and  
42 have begun to determine their fermentation characteristics. During this work, we found several  
43 isolates of five species that produce lactic acid and ethanol during wort fermentation:  
44 *Hanseniaspora vineae*, *Lachancea fermentati*, *Lachancea thermotolerans*, *Schizosaccharomyces*  
45 *japonicus*, and *Wickerhamomyces anomalus*. Tested representatives of these species yielded  
46 excellent attenuation, lactic acid production, and sensory characteristics, positioning them as  
47 viable alternatives to lactic acid bacteria (LAB) for the production of sour beers. Indeed, we  
48 suggest a new LAB-free paradigm for sour beer production that we term “primary souring”  
49 because the lactic acid production and resultant pH decrease occurs during primary fermentation,  
50 as opposed to kettle souring or souring via mixed culture fermentation.

51

52 **Keywords:** *Hanseniaspora vineae*, *Lachancea fermentati*, *Lachancea thermotolerans*,  
53 *Saccharomyces cerevisiae*, *Schizosaccharomyces japonicus*, *Wickerhamomyces anomalus*, lactic  
54 acid, sour beer, heterolactic fermentation

## 55 **Chemical compounds studied in this article:**

56 Lactic acid (PubChem CID: 612); Ethanol (PubChem CID: 702)

57 **Abbreviations:** ABV, alcohol by volume; DIC, differential interference contrast; EtOH, ethanol;  
58 FG, final gravity; gDNA, genomic DNA; IBU, international bittering unit; LAB, lactic acid  
59 bacteria; LASSO, lactic acid specific soft-agar overlay; N-J, neighbor-joining; OG, original  
60 gravity; WLN, Wallerstein Laboratories nutrient; YPD, yeast extract, peptone, and dextrose  
61

## 62 1. Introduction

63           Currently, we are in the midst of a global craft beer boom, with the number of small  
64 independent breweries growing at a tremendous pace (1). This has led to increased competition,  
65 not only with the large macrobrewers but among the craft brewers themselves. As such, there is a  
66 need in the industry to differentiate oneself from, minimally, other local breweries. This has  
67 fueled experimentation with the core beer ingredients of water (2), malted grain (3), hops (4) and  
68 yeast (5), as well as with various adjuncts. Much of this experimentation is also focused on  
69 locally sourced ingredients to capture terroir and bolster the local economy (6,7).

70           Despite this widespread experimentation, the isolation and use of novel yeasts for  
71 brewing has lagged behind that of the other ingredients. This is in part due to the easy  
72 availability of numerous ale and lager strains from reputable commercial suppliers such as White  
73 Labs, Wyeast, and Lallemand (8). However, focusing on two species, *Saccharomyces cerevisiae*  
74 for ales and *Saccharomyces pastorianus* for lagers, naturally limits the genotypic and phenotypic  
75 variation available in brewing strains. This also translates into a limited palette of aromatic and  
76 flavor compounds made by these strains, especially considering their extremely high  
77 evolutionary relatedness (9,10).

78           To overcome this constraint, several laboratories and breweries have begun to culture  
79 wild yeasts and characterize their beer fermentation capabilities. Most efforts have focused on  
80 wild ale and lager strains (11,12) to increase the available genetic diversity of strains that  
81 naturally display high ethanol tolerance. However, multiple strains of yeasts in the  
82 *Brettanomyces*, *Hanseniaspora*, *Lachancea*, and *Pichia* genera (13-15) have also been  
83 investigated as alternative species for the production of beer.

84 We also recently began bio-prospecting for wild yeasts with desirable brewing  
85 characteristics (5). Here, we report the collection of nearly 300 strains from 26 genera. During  
86 trial wort fermentations, we found that strains from five species (*Hanseniaspora vineae*,  
87 *Lachancea fermentati*, *Lachancea thermotolerans*, *Schizosaccharomyces japonicus*, and  
88 *Wickerhamomyces anomalus*) were capable of heterolactic fermentation of sugar into lactic acid,  
89 ethanol, and CO<sub>2</sub>. Larger-scale brewing with four strains demonstrated that these yeasts are  
90 highly attenuative, flocculate well, yield appreciable levels of lactic acid, and produce pleasant  
91 aromatic and flavor compounds. We suggest a new paradigm for sour beer production called  
92 “primary souring” that avoids the use of lactic acid bacteria (LAB) and instead relies solely on  
93 lactic acid production by a heterofermentative yeast during primary fermentation.

94

## 95 **2. Materials and methods**

### 96 *2.1. Strains, media, and other reagents*

97 *S. cerevisiae* strain WLP001 was purchased from White Labs (San Diego, CA). Wild  
98 strains were isolated as described in (5). All yeast strains were routinely grown on yeast extract,  
99 peptone, and dextrose (YPD; 1% (w/v) yeast extract, 2% (w/v) peptone, and 2% (w/v) glucose)  
100 plates containing 2% (w/v) agar at 30°C and in YPD liquid culture at 30°C with aeration unless  
101 otherwise noted. Wallerstein Laboratories nutrient (WLN) agar contained 4 g/L yeast extract, 5  
102 g/L tryptone, 50 g/L glucose, 0.55 g/L KH<sub>2</sub>PO<sub>4</sub>, 0.425 g/L KCl, 0.125 g/L CaCl<sub>2</sub>, 0.125 g/L  
103 MgSO<sub>4</sub>, 2.5 mg/L FeCl<sub>3</sub>, 2.5 mg/L MnSO<sub>4</sub>, 22 mg/L bromocresol green, and 15 g/L agar. All  
104 strains were stored as 15% (v/v) glycerol stocks at -80°C. Media components were from Fisher

105 Scientific (Pittsburgh, PA, USA) and DOT Scientific (Burnton, MI, USA). All other reagents  
106 were of the highest grade commercially available.

## 107 *2.2. Strain identification and phylogenetic analysis*

108 To identify wild yeasts at the species level, frozen stocks were streaked onto YPD plates  
109 and incubated at 30°C until single colonies formed (18-48 h). Colonies were then picked into  
110 microcentrifuge tubes containing 100 µL of lysis solution (0.2 M LiOAc and 1% SDS) and  
111 incubated in a 65°C water bath for ≥15 min to lyse the cells. After 300 µL of 100% isopropanol  
112 was added to the tubes, they were mixed by vortexing, and the cell debris and genomic DNA  
113 (gDNA) were pelleted in a microcentrifuge for 5 min at maximum speed. The supernatant was  
114 decanted, and remaining traces were completely removed from the pellets by aspiration. The  
115 gDNA was resuspended in 50-100 µL TE buffer (10 mM Tris-HCl, pH 8, and 1 mM EDTA),  
116 and a 1-min spin at maximum speed was used to pellet the cell debris to clarify the DNA  
117 solution. The variable D1/D2 portion of the eukaryotic 26S rDNA was then amplified by PCR  
118 from the gDNA templates using oligos NL1 (GCATATCAATAAGCGGAGGAAAAG) and  
119 NL4 (GGTCCGTGTTTCAAGACGG) (11) and the following cycling conditions: 98°C for 5  
120 min; 35 cycles of 98°C for 30 s, 55°C for 30 s, and 72°C for 30 s; and 72°C for 10 min. The  
121 PCRs were assessed for D1/D2 amplification by running 10% of the reaction volume on 1%  
122 (w/v) agarose gels at 100 V (560 bp expected product size). The amplified DNA was then  
123 purified using a PCR Purification Kit (Thermo Scientific, Waltham, MA) and quantified using a  
124 BioTek Synergy H1 plate reader. The DNA was sequenced by ACGT, Inc. (Wheeling, IL) using  
125 primer NL1, and the sequence was used to query the National Center for Biotechnology  
126 Information nucleotide database with the Basic Local Alignment Search Tool (BLAST;  
127 [http://blast.ncbi.nlm.nih.gov/Blast.cgi?CMD=Web&PAGE\\_TYPE=BlastHome](http://blast.ncbi.nlm.nih.gov/Blast.cgi?CMD=Web&PAGE_TYPE=BlastHome)).

128           After species identification, the phylogenetic relationships among the isolated strains of  
129 *H. vineae*, *L. fermentati*, *L. thermotolerans*, *S. japonicus*, and *W. anomalus* were determined by  
130 aligning their 26S rDNA sequences using ClustalX (16). The alignments were iterated at each  
131 step but otherwise utilized default parameters. ClustalX was also used to draw and bootstrap  
132 neighbor-joining (N-J) phylogenetic trees using 1000 bootstrap trials; the trees were visualized  
133 with TreeView v. 1.6.6 software (<http://taxonomy.zoology.gla.ac.uk/rod/rod.html>). The  
134 *Schizosaccharomyces pombe* rDNA sequence (GenBank accession HE964968) was included in  
135 the alignments as the outgroup, and this was used to root the N-J tree in TreeView. WLP001 was  
136 included to determine the relatedness of the wild strains to a commercially available ale yeast.  
137

### 138 *2.3. Test fermentations*

139           For laboratory-scale fermentations, select yeast strains were streaked for single colonies  
140 onto YPD plates as described above and grown to saturation in 4 mL of YPD liquid medium  
141 overnight at 30°C with aeration. The cell count of the starter cultures was approximated by  
142 measuring the OD<sub>660</sub> and converting that value to cells/mL as described at  
143 <http://www.pangloss.com/seidel/Protocols/ODvsCells.html>. In most cases, the saturated  
144 overnight cultures reached densities of  $\sim 5 \times 10^8$  cells/mL. These starter cultures were then used to  
145 inoculate  $\sim 400$  mL of blonde ale wort in 500 mL glass bottles capped with drilled rubber  
146 stoppers fitted with standard plastic airlocks. The wort was produced by mashing 65.9% Pilsner  
147 (2 Row) Bel and 26.9% white wheat malt at 65°C (149°F) for 75 min in the presence of 1 g/bbl  
148 CaCO<sub>3</sub> and 1.67 g/bbl CaSO<sub>4</sub> to yield an original gravity (OG) of 1.044. During the boil, 7.2%  
149 glucose was added, as well as Saaz hops to 25 international bittering units (IBUs). The  
150 fermentation cultures were incubated at 22.3±0.3°C ( $\sim 72^\circ\text{F}$ ) for 2 weeks. Prior to bottling into

151 standard 12-oz brown glass bottles, their final gravity (FG) was measured using a MISCO digital  
152 refractometer (Solon, OH), and pH was measured using an Accumet AB150 pH meter (Fisher  
153 Scientific). Bottle conditioning was conducted as in (17) at room temperature for  $\geq 2$  weeks.

154 Small-batch fermentations were performed at Mainiacal Brewing in Bangor, ME. To  
155 produce the test wort, 93.4% two-row base malt and 6.6% carapils were mashed at 66.7°C  
156 (152°F) to yield an OG of 1.046. During the boil, Loral hops were added to a final concentration  
157 of 5.3 IBUs. The wort was then chilled and split into 5-gal portions in separate carboys.  
158 Approximately  $1 \times 10^{11}$  cells of the indicated yeast strains were used to inoculate the carboys and  
159 allowed to ferment under anaerobic conditions at 21.7°C (71°F) for 1 month. Gravity  
160 measurements were taken both with a hydrometer and refractometer by standard methods. The  
161 final pH was recorded prior to bottling and bottle conditioning as above.

#### 162 *2.4. Yeast morphology analysis*

163 To determine colony morphology, the yeast strains were first grown with aeration  
164 overnight at 30°C in liquid YPD medium. Small volumes were then spotted onto YPD and WLN  
165 plates and streaked for single colonies. The plates were incubated at 30°C for ~48 h before  
166 imaging with an Epson V37 flatbed scanner. The same liquid cultures were sampled for  
167 microscopic analysis in the Indiana University Light Microscopy Imaging Center. Briefly, ~5  $\mu\text{L}$   
168 samples of cell culture were spotted onto 25 x 75 mm (1.0 mm thick) glass slides and covered  
169 with a 22 x 22 mm no. 1.5 cover slip. The live cells were then observed by differential  
170 interference contrast under oil immersion at 1000x magnification using a Nikon NiE microscope.  
171 Digital images of the fields of view were collected using Nikon Elements software.

#### 172 *2.5. Lactic acid specific soft-agar overlay (LASSO)*



173           The production of lactic acid by yeast cells was assayed as described in (18). Briefly,  
174 cells were grown overnight in liquid YPD medium at 30°C with aeration. Then, 2  $\mu$ L of each  
175 culture was spotted onto YPD10 plates (YPD agar supplemented with glucose to a final  
176 concentration of 10% w/v), allowed to absorb, and incubated overnight at 30°C. The plates were  
177 then covered with 6.5 mL soft-agar (0.5% agar in 300 mM Tris and 187 mM glutamate, pH 8.3).  
178 Upon solidification of the soft agar, a second soft-agar overlay was prepared by mixing 3.2 mL  
179 1% agar with 3.2 mL of a staining solution composed of 30 mM Tris/18.75 mM glutamate (pH  
180 8.3), 2.5 mM NAD, 0.5 mg/mL nitrotetrazolium blue, 125  $\mu$ g/mL phenazine methosulfate, 7 U  
181 glutamate pyruvate transaminase, and 7 U L[+]-lactate dehydrogenase (all LASSO components  
182 were from Sigma-Aldrich, St. Louis, MO). Strains producing lactic acid formed purple halos  
183 within 10 min, the color of which darkened with increasing incubation time at room temperature.  
184 Cells not producing lactic acid never formed halos.

#### 185 *2.5. Multi-well lactic acid production assay*

186           Because only a small number of strains can be tested for lactic acid production on a  
187 single plate in the LASSO assay, we also adapted it for use in multi-well plates. Briefly,  
188 individual strains were grown overnight in 100  $\mu$ L YPD10 medium in the wells of 96-well plates  
189 at 30°C with aeration in a BioTek Synergy H1 plate reader. To avoid evaporation of the medium,  
190 50  $\mu$ L mineral oil was used to overlay each well. Then, 100  $\mu$ L of staining solution (30 mM  
191 Tris/18.75 mM glutamate (pH 8.3), 2.5 mM NAD, 0.5 mg/mL nitrotetrazolium blue, 125  $\mu$ g/mL  
192 phenazine methosulfate, 1 U/mL glutamate pyruvate transaminase, and 1 U/mL L[+]-lactate  
193 dehydrogenase) was added to each well and mixed by agitation in the plate reader. The reaction

194 proceeded for  $\geq 10$  min at room temperature, and the presence of lactic acid was indicated by the  
195 gold colored solution turning green (and eventually blue with extended incubation).

## 196 2.6. Gas chromatography-mass spectrometry (GC-MS) analysis of lactic acid

197

198

## 199 3. Results

### 200 3.1. Establishment of the yeast bank

201 We previously reported an initial description of our bio-prospecting and characterization  
202 of wild yeasts for use in the brewing industry (5). Here, we present the updated culture  
203 collection. In all, 284 strains (Supplementary Table 1) from 54 different species in 26 genera  
204 (Table 1) were collected, mostly from the American Midwest. Over 68% (195 strains) were from  
205 various locations in Indiana alone (Supplementary Table 1). Species known to have brewing  
206 potential, *e.g.*, *S. cerevisiae* and *B. bruxellensis*, were isolated from many sources, and the 37 *S.*  
207 *cerevisiae* strains recovered made it the most frequently isolated species (Table 1). However,  
208 these yeasts represented a minority (~13% *S. cerevisiae* and < 3% *B. bruxellensis*) of the total.  
209 Instead, species in the *Hanseniaspora*, *Kluyveromyces*, *Lachancea*, *Pichia*, *Torulaspora*, and  
210 *Wickerhamomyces* genera dominated (Table 1).

211 To determine the relative usefulness of these strains in beer brewing, small laboratory-  
212 scale beer fermentations were performed for each isolate. Most strains were able to metabolize  
213 maltose (and other wort sugars) into ethanol and carbon dioxide, but the strains greatly varied in  
214 their levels of attenuation, ability to flocculate, and in the sensory profiles of the aromatic and

215 flavor compounds that they produced (data not shown). Interestingly, these variations were noted  
216 both between species and among isolates of the same species, even when two distinct strains of  
217 the same species were isolated from one sample. Notable exceptions to this were all of the *Pichia*  
218 species. The sensory profiles of beers fermented with these yeasts were uniformly abhorrent,  
219 with the most colloquial but apt descriptor being “demon sulfur fecal juice.” Regardless, many of  
220 the other yeasts displayed brewing potential that was commensurate with our control *S.*  
221 *cerevisiae* ale yeast strain WLP001. Reports of the detailed analysis of the brewing  
222 characteristics of exemplary single strains and strain groups are forthcoming. Herein though, we  
223 focus on a group of yeasts that appeared to be capable of heterolactic fermentation of sugar into  
224 lactic acid, ethanol, and CO<sub>2</sub>.

### 225 3.2. Five heterofermentative yeast species.

226 During our sensory analyses of the laboratory-scale fermentations above, we noted that  
227 many of the strains were producing beers that were characterized as tart or sour (Table 2), akin to  
228 styles that are produced with the aid of LAB (19). When we grouped these strains, we found that  
229 they were all members of five species: *H. vineae*, *L. fermentati*, *L. thermotolerans*, *S. japonicus*,  
230 and *W. anomalus* (Supplementary Table 1 and Fig. 1). To determine if this apparent  
231 heterofermentative activity was specific to evolutionarily closely related yeasts, we aligned the  
232 sequences of the D1/D2 variable region of their ribosomal DNA and plotted a phylogenetic tree.  
233 As shown in Figure 1, three of the species (*H. vineae*, *L. fermentati*, and *L. thermotolerans*) are  
234 closely related to ale yeast (WLP001), but the other two (*S. japonicus*, and *W. anomalus*) form  
235 more distinct clades.

236           Regardless of their evolutionary relationships, the strains listed in Table 2 and other  
237 isolates of the same species (data not shown) varied in their fermentative activities. Their levels  
238 of attenuation varied from 40-83%, with decreases in the initial pH of 5.0 to as low as 3.21.  
239 Although some of these differences may be attributable to differences among the species  
240 themselves, intra-species differences were also noted, especially during sensory analyses. For  
241 instance, *L. thermotolerans* YH73 produced a “very sour” flavor with berry notes, but the same  
242 beer fermented with *L. thermotolerans* YH79 was characterized as only “slightly tart” yet clean  
243 and rounded (Table 2).

### 244 3.3. Characterization of strains WYP39, YH72, YH82, YH140, and YH156

245           Because the trial fermentations above were performed in a high-throughput manner, we  
246 chose representative strains for more in-depth investigation. We compared their colony and  
247 cellular morphologies, sought to verify that they were producing lactic acid, and performed  
248 larger-scale fermentations. Figure 2A shows representative colony morphologies for the strains  
249 grown on YPD and WLN agar. The wild *S. cerevisiae* strain YH166 was included for  
250 comparison. On YPD plates, all strains produced colonies that were creamy white, round, and  
251 raised. The *L. fermentati* WYP39 and *L. thermotolerans* YH140 colonies were also glossy, while  
252 the others had comparatively matte surfaces. Based on colony size, the *H. vineae* YH72, *W.*  
253 *anomalus* YH82, and (especially) *S. japonicas* YH156 strains grew slower on YPD medium than  
254 the other species. However, all strains grew at similar rates on WLN agar. All of the species also  
255 took up the bromocresol green pH indicator dye from the WLN medium, with YH166 and  
256 YH140 attaining a pale mint green colony color, YH156 assuming a green shade, and WYP39,  
257 YH72, and YH82 colonies turning dark green. The YH72 and YH82 colonies additionally  
258 displayed pale margins on WLN plates.

259 We next observed the cellular morphologies of the six species above using differential  
260 interference contrast (DIC) microscopy (Fig. 2B-G). As expected, all strains except YH156  
261 appeared as typical round-to-ellipsoid budding yeast, though YH72 failed to display the  
262 “bowling pin” shape usually associated with apiculate yeast like *H. vineae*. Additionally, the  
263 YH72 and YH82 cells displayed the propensity to clump together (Fig. 2C and D), even after  
264 dilution and vigorous vortexing. This may be an effect of growth with aeration, as these strains  
265 were no more flocculant during fermentation than WYP39 (Table 3) or YH166 (data not shown).  
266 The YH156 cells were much larger than the other species analyzed and displayed the usual  
267 *Schizosaccharomyces* rod-shaped morphology (Fig. 2F). We also observed evidence of  
268 microhyphae (20) among these cells. This mycelial mode of growth may explain the excellent  
269 flocculation of YH156 during fermentation (Table 3) (21).

#### 270 3.4. Strains WYP39, YH72, YH82, YH140, and YH156 produce lactic acid

271 We further sought to determine if strains WYP39, YH72, YH82, YH140, and YH156  
272 were truly producing lactic acid during fermentation, rather than one or more other secondary  
273 metabolites that yield a tart/sour flavor (22). Using the LASSO assay for lactic acid production  
274 by yeast (18), we found that all five strains produced lactic acid (denoted by dark halos in Fig.  
275 3A), similar to the *Lactobacillus plantarum* positive control. In contrast, the *S. cerevisiae*  
276 WLP001 negative control failed to generate a halo. Because the LASSO assay can only be used  
277 for a limited number of strains on a single plate, we adapted it into a multi-well plate assay (Fig.  
278 3B). Here, lactic acid production is evident by the golden-colored assay medium turning green,  
279 as indicated by the LAB controls. Again, WLP001 failed to generate detectable lactic acid, as did  
280 a common research strain of *E. coli*. However, multiple tested isolates of *L. thermotolerans*, *L.*  
281 *fermentati*, *H. vineae*, *S. japonicus*, and *W. anomalus* did test positive for lactic acid production.

282 Some individual *L. thermotolerans* strains failed to generate lactic acid (wells 2 and 4) or did so  
283 slowly, as certain wells were just beginning to turn green (well 3) when the image in Figure 3B  
284 was acquired. These results correspond with sensory analysis of beers fermented with the various  
285 *L. thermotolerans* strains, which ranged from not sour to very tart (Table 2 and data not shown).

#### 286 *3.4. Analysis of beers fermented with lactic acid-producing yeasts*

287 To monitor the activities of WYP39, YH72, YH82, and YH156 in larger-scale  
288 fermentations, we inoculated these strains into glass carboys containing 19 L (5 gal) each of an  
289 identical blonde wort. Because the beer brewing capabilities of a *L. thermotolerans* strain were  
290 recently described (14), we omitted strain YH140 from these assays. All of the strains had short  
291 lag times (*i.e.*, the approximate time from inoculation to the first visible signs of fermentation)  
292 ranging from 6-14 h (Table 3). These lag times to fermentation were similar to that of WLP001  
293 inoculated in a similar blonde wort (~12 h, data not shown). However, the kinetics of the full  
294 fermentation differed for each lactic acid-producing yeast. WYP39 had the shortest lag time and  
295 fermented rapidly for 2 weeks, at which point it slowed considerably and required an additional 2  
296 weeks to reach a final gravity of 0.099 (Table 3). YH72 was a slow and steady fermenter,  
297 attaining a terminal gravity of 1.000 after 3 weeks. YH82 was similar, but required a full 4 weeks  
298 to reach a final gravity of 1.001.

299 The YH156 strain displayed the most variant fermentative characteristics. After reaching  
300 a vigorous state of fermentation at 14 h (Table 3), popcorn-like clusters of cells formed and  
301 floated around within the fermenter (Supplemental Fig. 1). Eventually, they settled into a  
302 mountainous pile against one side of the carboy before compacting down into a yeast slurry with  
303 a typical appearance on the bottom of the fermenter. The fermentation reached a final gravity of

304 0.099 approximately 27 days after inoculation. The final pH of each beer was recorded and  
305 varied from a low of 3.20 to a high of 3.74. Sensory analyses of each beer were conducted  
306 (Supplemental Fig. 2), and the tasting notes are discussed in Sections 4.1-4.5 below.

307 We also quantified the concentration of L-lactic acid present in each beer by GC-MS  
308 (Fig. 3C). We used Cauldron, a commercially available sour beer made by mixed fermentation of  
309 yeast and LAB (17), as a positive control for lactic acid production; it contained 100.54 mM  
310 lactate. Based on a lactate standard curve, WYP39, YH72, YH82, and YH156 produced 10.02,  
311 35.69, 29.05, and 50.09 mM lactate, respectively. These results contrast with those from the  
312 LASSO assay in Figure 3A, where YH156 displayed the least evidence of lactic acid production.  
313 Because the lactic acid production occurred in the presence of oxygen in the LASSO assay, this  
314 may indicate that strain YH156 is Crabtree negative or only weakly Crabtree positive, *i.e.*,  
315 requiring anaerobic conditions for fermentation (see (23) and references therein). It should also  
316 be noted that the beers analyzed by GC-MS were fermented in a brewery that utilizes LAB, and  
317 thus, it remains a formal possibility that they may have been inadvertently contaminated by other  
318 organisms that can generate lactic acid. However, the results in Figures 3A and 3B are from pure  
319 cultures of WYP39, YH72, YH82, and YH156, which still yield lactic acid during fermentation  
320 in the presence of antibiotics or 75 IBU wort in a laboratory setting (data not shown), strongly  
321 suggesting that LAB contamination is not the source of the lactic acid.

#### 322 **4. Discussion**

323 The next phase in the “local” movement in the beer industry will be the isolation and use  
324 of local yeast strains in brewing. Indeed, in the U.S., nearly all commercially available ale and  
325 lager strains are of European origin, so no American beer will ever truly be local without the

326 inclusion of New World yeast. Here, we detailed our regional yeast bio-prospecting efforts and  
327 the initial characterization of nearly 300 strains for use in fermentation. Within this strain bank,  
328 we uncovered five species that generate lactic acid and ethanol during primary fermentation and  
329 suggest that they can be used in a novel, LAB-free beer souring method (see Section 4.6. below).

#### 330 4.1. *H. vineae*

331 As the species name suggests, *H. vineae* is typically associated with wine, where it has  
332 previously been investigated alone and in combination with *S. cerevisiae* for grape must  
333 fermentation (24-26). The strains previously tested are notable for the production of high levels  
334 of 2-phenylethyl acetate, which is an aromatic compound that lends floral, fruity, and/or honey-  
335 like notes to wine (25). Although yeasts in the *Hansenia* genus are the predominant species  
336 found on grapes (27-29), they are also found elsewhere. For instance, *H. vineae* has been isolated  
337 from agave plants, must, and cooked agave, as well as throughout tequila distilleries (reviewed in  
338 (30)). Here, we enriched for *H. vineae* strains from the bark of oak, sycamore, and ash trees,  
339 blueberries, and grapes (Supplementary Table 1).

340 To our knowledge, this is the first report of pure cultures of *H. vineae* being used to  
341 ferment beer. Strain YH72 ferments slowly relative to typical commercially available ale yeasts,  
342 but reached high levels of attenuation after only two weeks (Table 2) and further attenuated with  
343 additional fermentation time (Table 3). The beers produced by short fermentations with YH72  
344 were slightly sour but clean and highly drinkable, with notes of apple cider. Longer fermentation  
345 yielded very sour beer with a pH (3.23) and acidic bite reminiscent of beers produced with LAB,  
346 as well as stone fruit notes (Table 3, Supplementary Fig. 2). Preliminary experiments also  
347 indicate that repeated exposure to wort fermentation conditions may adapt YH72 to attenuate



348 more quickly (M. Bochman, observations). Based on these results, other closely related species,  
349 such as *H. guillieromondii*, *H. occidentalis*, *H. opuntiae*, *H. osmophila*, *H. uvarum*, and *H.*  
350 *valbyensis*, should be investigated for their use as brewing strains and the production of lactic  
351 acid. We isolated several strains from three of these species (Table 1) and plan to characterize  
352 their fermentative capabilities.

#### 353 4.2. *L. fermentati*

354 Very little is known about *L. fermentati*, especially with regard to beverage fermentation.  
355 In the environment, *L. fermentati* is generally associated with leaves and decaying plant matter  
356 (31,32). We isolated our strains from the bark of live trees such as oak, hickory, and birch  
357 (Supplementary Table 1). Industrially, this species of yeast has also been found in fermented  
358 (wine (33), cachaça (34), and water kefir (35)) and non-fermented beverages (coconut water and  
359 fruit juices (36)). However, its effects on the sensory characteristics of these beverages are  
360 largely unknown.

361 As with *H. vineae*, this also appears to be the first report of beer fermented with pure  
362 cultures of *L. fermentati*. Our laboratory-scale test fermentations indicated that strain WYP39  
363 displayed decent wort attenuation for a wild strain (60%, Table 2), and longer fermentation in a  
364 larger-scale fermentation yielded a dry product (Table 3). The final pH was modest compared to  
365 other sour beers (Table 3), creating a flavor that was more tart than sour, but this was  
366 accentuated by light pineapple and mango flavors. There are many species in the *Lachancea*  
367 genus (37). Based on the desirable brewing characteristics of *L. fermentati* and *L. thermotolerans*  
368 (discussed below in Section 4.3. and in Domizio *et al.* (14)), it will be interesting to assess the

369 activities of these other species during beer fermentation. Thus, our four isolates of *L. kluyveri*  
370 (Table 1) will be the focus of future work.

#### 371 4.3. *L. thermotolerans*

372 Like the closely related *L. fermentati*, *L. thermotolerans* also colonizes leaf surfaces (32),  
373 as well as insects (38,39) and sugarcane (40). We isolated our strains from the barks of numerous  
374 tree species, mulberries, bell pepper, and persimmon fruit (Supplementary Table 1). Various  
375 strains of *L. thermotolerans* have been studied for their effects on wine fermentation (reviewed  
376 in (28)), though usually in co-fermentations with *S. cerevisiae* (e.g., (41,42). Recently, *L.*  
377 *thermotolerans* strain Lt101 was shown to be a viable yeast for beer production (14), and the  
378 same group also found that three *L. thermotolerans* strains including Lt101 produce lactic acid  
379 during fermentation. Although this is similar to our observations (Table 2 and data not shown),  
380 the strains investigated by Domizio *et al.* (14) only decreased the pH of wort from 5.66 to 4.28-  
381 3.77 during fermentation. Most of their experiments yielded final pH values in the 4.17-4.3  
382 range, however, which is similar to the pH decrease caused by *S. cerevisiae* UCD 915. Our *L.*  
383 *thermotolerans* isolates that produced noticeably tart beers reached terminal pH values of ~3.35  
384 (Table 2 and data not shown). These discrepancies are likely due to differences in the  
385 experimental set ups, as well as strain-to-strain variability, which is discussed in Section 5  
386 below.

#### 387 4.4. *S. japonicus*

388 *S. japonicus* is closely related to *S. pombe*, which was originally isolated from African  
389 millet beer (reviewed in (43)). *S. japonicus* itself was first isolated from strawberries in Japan  
390 (44), and we recovered two strains from the bark of an oak tree in northeastern Pennsylvania

391 (Supplementary Table 1). Unlike the other yeast species investigated here, *S. japonicus* is a  
392 fission yeast rather than a budding yeast (Fig. 2E). This difference in physiology is borne out of  
393 genomic differences, as *S. japonicus* is as evolutionarily distant from *S. cerevisiae* as each yeast  
394 is from humans (45).

395         Regardless, *S. japonicus* is associated with indigenous fermented beverages (*e.g.*, kaffir  
396 beer, plantain beer, palm wine, sugar cane wine, and sake) around the world (46), wine  
397 production (47), and was isolated from spontaneously fermented beer in North Carolina (48).  
398 However, no characterization of the beer is available. Thus, this is the first rigorous report of *S.*  
399 *japonicas* used for primary fermentation of beer. The attenuation levels of strain YH156 were  
400 excellent in both laboratory- and large-scale fermentations (Table 2 and 3), and the aroma and  
401 flavor profiles of these beers included common descriptors of sour, fruity, and stone fruit.  
402 Individual tasters identified green apple Jolly Rancher, tart apple, pear, pineapple, and peach  
403 notes.

404         The *Schizosaccharomyces* genus includes four member species: *S. cryophilus*, *S.*  
405 *japonicus*, *S. octosporus*, and *S. pombe*. We isolated two *S. japonicus* and four *S. pombe* strains  
406 (Table 1), but only the *S. japonicus* YH156 strain yielded appreciable lactic acid production  
407 during our trial fermentations (Tables 2, 3, and data not shown). Regardless, we believe that it is  
408 worthwhile to test other strains of these species, as well as *S. cryophilus* and *S. octosporus*, for  
409 their use as in the primary fermentation of beer.

#### 410 4.5. *W. anomalus*

411         *W. anomalus*, previously known as *Saccharomyces anomalus* (49), has multiple roles in  
412 the biotechnology, agriculture, and food production fields. It is often found in association with

413 grain and is especially useful to inhibit storage molds during malting (50). Concerning beverage  
414 fermentation, *W. anomalus* is generally referred to as a beer spoilage organism (51), but it is also  
415 necessary for cocoa and coffee bean fermentation (52). We isolated 17 strains of *W. anomalus*  
416 from diverse sources: fruit, tree bark, beer, flowers, soil, and spent grain (Table 1 and  
417 Supplementary Table 1).

418         Although *W. anomalus* has been investigated for its use in apple wine and hard cider  
419 production (53,54), the only work involving beer has focused on the spoilage properties of this  
420 species (51). As with *S. japonicus* YH156 above, the YH82 strain of *W. anomalus* yielded  
421 excellent attenuation at both fermentation scales tested (Tables 2 and 3). This strain produced a  
422 less intense sour character than others, but the beer was characterized as clean, aromatic, and  
423 fruity with notes of pear, apple, and apricot. Of all of the lactic acid-producing yeasts described  
424 herein, *W. anomalus* is perhaps the most exciting because the *Wickerhamomyces* clade contains  
425 over a dozen species, with more being discovered and characterized with regularity (55).  
426 Although we did not isolate closely related species to *W. anomalus*, our small collection of 17  
427 strains is nonetheless an excellent place to begin to determine the usefulness of these yeasts in  
428 beer fermentation.

#### 429 4.6. Primary souring

430         There are two general methods by which sour beers are produced: kettle souring and  
431 mixed culture fermentation (Fig. 4) (19). Kettle souring is the more rapid and modern technique.  
432 During kettle souring, unhopped or lightly hopped wort is produced in a brew kettle as normal,  
433 but then it is only partially cooled to approximately 40-45°C. This temperature favors the growth  
434 of LAB, which can be introduced by inoculation with pure cultures or the addition of grain. The

435 LAB then sour the wort in the brew kettle to the desired pH, which usually occurs over the  
436 course of 24-48 h. The soured wort in the kettle is ultimately boiled a second time to kill the  
437 LAB, and hops can be introduced at this point. The wort is then transferred to a fermenter and  
438 (typically) inoculated with *S. cerevisiae* for primary fermentation. Although this method affords  
439 brewers tight control over acid production (souring can be stopped at any time via boiling) and is  
440 less time consuming than mixed culture fermentation (below), it also has inherent weaknesses.  
441 First, the entire souring process occurs in the brew kettle, so it prevents additional wort  
442 production in that vessel. Indeed, kettle souring is often relegated to weekends when small  
443 breweries are otherwise not in production mode. Second, boiling the wort after it has been soured  
444 drives off volatile aromatics that may also have been produced during souring, yielding beers  
445 that are described and criticized as lacking in depth and character. To combat some of these  
446 sensory downsides, some brewers are now barrel aging kettle sours to impart oak complexity to  
447 the final beers.

448 Souring by mixed culture fermentation is the more traditional method. In this process  
449 (Fig. 4), lightly hopped wort is produced in the brew kettle and transferred to a fermenter. There,  
450 it can be inoculated with *S. cerevisiae* for primary fermentation. In some cases, LAB are added  
451 prior to or concurrently with *S. cerevisiae* (or *Brettanomyces* spp. in 100% “Brett” beers). If the  
452 LAB are added at this stage, souring begins during primary fermentation. After the yeast has  
453 attenuated the beer to the desired level, it is then barrel aged for months or years until it attains a  
454 low pH and complex flavor profile. Barrel aging is another stage at which LAB and  
455 *Brettanomyces* spp. can be added (either resident in the barrels or as pure inocula) to induce  
456 souring. Mixed culture souring produces more complex and nuanced flavors in beer than kettle

457 souring, but it suffers from a huge time lag from wort production to the final beer, and it requires  
458 a large space dedicated to housing the barrels.

459         Here, we propose a third paradigm for sour beer production that we call primary souring.  
460 In this method, the wort is inoculated with a yeast capable of heterolactic fermentation rather  
461 than *S. cerevisiae*, and souring occurs during primary fermentation in the absence of LAB (Fig.  
462 4). The yeast strains described in Tables 2 and 3 and in the text above did not display rapid  
463 fermentation kinetics like commercially available ale yeasts, but they still completed  
464 fermentation within a month, displaying excellent levels of attenuation and medium-to-high  
465 flocculation (Table 3). Further, the sensory profiles of the beers were superior to kettle soured  
466 beer, displaying both lactic tartness and fruity aromatic and flavor notes. Compared to the sour  
467 production methods above, primary souring is beneficial in that it frees up the brew kettle and  
468 does not require lengthy aging in barrels, though oak aging is a possibility after primary  
469 fermentation (Fig. 4). Perhaps most alluringly, primary souring does not require the introduction  
470 of bacteria into the brewery, and preliminary tests suggest that *H. vineae*, *L. fermentati*, *L.*  
471 *thermotolerans*, *S. japonicus*, and *W. anomalus* can be eliminated as easily as *S. cerevisiae* from  
472 brewing equipment using standard clean-in-place protocols (data not shown). As is typical of  
473 yeasts, these species are also hop tolerant, enabling more liberal use of hops in wort production  
474 for sour beers. However, it should be noted that yeast growth can be inhibited by hop iso- $\alpha$ -acids  
475 in acidic milieus (56), so the absolute levels of hop tolerance will likely vary by strain and the  
476 desired pH of the sour beer.

477

## 478 **5. Conclusions and Outlook**

479           We set out to isolate and characterize new yeasts for use in beer fermentation, to mine the  
480 natural treasure trove of wild strains for novel aromas and flavors that have been missed by  
481 focusing on the currently used highly genetically related brewing yeast strains of *S. cerevisiae*.  
482 Here, we reported the results of our local bio-prospecting efforts and highlighted the discovery of  
483 a set of yeast species that produce both lactic acid and ethanol during primary fermentation. It is  
484 unclear how widespread this heterolactic fermentation phenotype is among ethanol-tolerant  
485 yeasts, but its presence in the fission yeast *S. japonicus* and budding yeasts like *H. vineae*, which  
486 are separated by ~1 billion years of evolution (45), may indicate that heterolactic fermentation is  
487 an ancient and conserved metabolic process among single-celled fungi. Arguing against this  
488 hypothesis is the lack of detectable lactic acid production by related strains of the same species,  
489 *e.g.*, differences among *L. thermotolerans* isolates ((14) and data not shown). Perhaps the genes  
490 enabling lactic acid production are on an extrachromosomal element only found in certain  
491 strains, or they may be epigenetically silenced in some cases but not others. The latter possibility  
492 is intriguing given the prion-based heritable changes in sugar metabolism that are caused by  
493 bacteria communicating with yeast cells via lactic acid (57,58). Regardless, it is our hope that the  
494 strains described above and the primary souring process put forth here will add strength to the  
495 already growing sour beer movement in the U.S. and abroad.

496

## 497 **Acknowledgements**

498 We thank Andrea Baillo, Elise Bochman, Henri Bochman, Chris Boggess, Kris Brown, Shannon  
499 Brown, Adam Covey, Sara Davidson, Jeff Ewer, Todd Green, Ted Herrera, Austin Kelley, Steve  
500 Llewelyn, Andrew Mason, Colin McCloy, Jared Miller, Ted Miller, Sasha Pefferman, Adam

501 Quirk, Kevin Smolar, Jack Sramek, Caleb Staton, Julia van Kessel, and Linda van Kessel for  
502 collecting samples for our yeast hunting projects.

503

## 504 References

- 505 1. Jones, L. (2016). National Beer Wholesalers Association,  
506 [https://www.nbwa.org/resources/permitted-breweries-hit-another-record-2016-7190?utm\\_source=Daily+Brew&utm\\_campaign=11191ec188-](https://www.nbwa.org/resources/permitted-breweries-hit-another-record-2016-7190?utm_source=Daily+Brew&utm_campaign=11191ec188-The+Daily+Brew%3A+January+12%2C+2017&utm_medium=email&utm_term=0_935b7e0b70-11191ec188-36689953)  
507 [The+Daily+Brew%3A+January+12%2C+2017&utm\\_medium=email&utm\\_term=0\\_935](https://www.nbwa.org/resources/permitted-breweries-hit-another-record-2016-7190?utm_source=Daily+Brew&utm_campaign=11191ec188-The+Daily+Brew%3A+January+12%2C+2017&utm_medium=email&utm_term=0_935b7e0b70-11191ec188-36689953)  
508 [b7e0b70-11191ec188-36689953](https://www.nbwa.org/resources/permitted-breweries-hit-another-record-2016-7190?utm_source=Daily+Brew&utm_campaign=11191ec188-The+Daily+Brew%3A+January+12%2C+2017&utm_medium=email&utm_term=0_935b7e0b70-11191ec188-36689953).  
509
- 510 2. Brungard, M. (2014) Calcium and Magnesium in Brewing Water. *The New Brewer*, **31**,  
511 80-88.
- 512 3. So, A. (2014) Developing New Barely Varieties: a Work in Progress. *The New Brewer*,  
513 **31**, 60-68.
- 514 4. Bernstein, J.M. (2010), *Imbibe Magazine*, Portland, OR.
- 515 5. Osburn, K., Ahmad, N.N. and Bochman, M.L. (2016) Bio-prospecting, selection, and  
516 analysis of wild yeasts for ethanol fermentation. *Zymurgy*, **39**, 81-88.
- 517 6. Kallenberger, M. (2016) Local Sourcing from the Craft Beer Drinker's Perspective. *The*  
518 *New Brewer*, **34**, 84-88.
- 519 7. Hieronymus, S. (2016) The Importance of Being Local. *The New Brewer*, **34**, 90-96.
- 520 8. Carpenter, D. (2014), *Craft Beer & brewing*. Unfiltered Media Group, LLC,  
521 <http://beerandbrewing.com/VKRJ0isAAF-R9GMY/article/liquid-vs.-dry-yeast>.
- 522 9. Borneman, A.R., Forgan, A.H., Kolouchova, R., Fraser, J.A. and Schmidt, S.A. (2016)  
523 Whole Genome Comparison Reveals High Levels of Inbreeding and Strain Redundancy  
524 Across the Spectrum of Commercial Wine Strains of *Saccharomyces cerevisiae*. *G3*.
- 525 10. Gallone, B., Steensels, J., Pahl, T., Soriaga, L., Saels, V., Herrera-Malaver, B.,  
526 Merlevede, A., Roncoroni, M., Voordeckers, K., Miraglia, L. *et al.* (2016) Domestication  
527 and Divergence of *Saccharomyces cerevisiae* Beer Yeasts. *Cell*, **166**, 1397-1410 e1316.
- 528 11. Lee, Y.J., Choi, Y.R., Lee, S.Y., Park, J.T., Shim, J.H., Park, K.H. and Kim, J.W. (2011)  
529 Screening wild yeast strains for alcohol fermentation from various fruits. *Mycobiology*,  
530 **39**, 33-39.
- 531 12. Sampaio, J.P. and Goncalves, P. (2008) Natural populations of *Saccharomyces*  
532 *kudriavzevii* in Portugal are associated with oak bark and are sympatric with *S. cerevisiae*  
533 and *S. paradoxus*. *Applied and environmental microbiology*, **74**, 2144-2152.
- 534 13. Steensels, J. and Verstrepen, K.J. (2014) Taming wild yeast: potential of conventional  
535 and nonconventional yeasts in industrial fermentations. *Annu Rev Microbiol*, **68**, 61-80.
- 536 14. Domizio, P., House, J.F., Joseph, C.M.L., Bisson, L.F. and Bamforth, C.W. (2016)  
537 *Lachancea thermotolerans* as an alternative yeast for the production of beer. *Journal of*  
538 *the Institute of Brewing*, **122**, 599-604.
- 539 15. Lentz, M. (2014) Isolating Wild Yeast Strains. *Zymurgy*, **37**, 54-59.



- 540 16. Larkin, M.A., Blackshields, G., Brown, N.P., Chenna, R., McGettigan, P.A., McWilliam,  
541 H., Valentin, F., Wallace, I.M., Wilm, A., Lopez, R. *et al.* (2007) Clustal W and Clustal  
542 X version 2.0. *Bioinformatics*, **23**, 2947-2948.
- 543 17. Rogers, C.M., Veatch, D., Covey, A., Staton, C. and Bochman, M.L. (2016) Terminal  
544 acidic shock inhibits sour beer bottle conditioning by *Saccharomyces cerevisiae*. *Food*  
545 *Microbiol*, **57**, 151-158.
- 546 18. Witte, V., Krohn, U. and Emeis, C.C. (1989) Characterization of yeasts with high L[+]-  
547 lactic acid production: lactic acid specific soft-agar overlay (LASSO) and TAFE-patterns.  
548 *J Basic Microbiol*, **29**, 707-716.
- 549 19. Tonsmeire, M. (2014) *American Sour Beer: Innovative Techniques for Mixed*  
550 *Fermentations*. Brewers Publications, Boulder, CO.
- 551 20. Enczi, K., Yamaguchi, M. and Sipiczki, M. (2007) Morphology transition genes in the  
552 dimorphic fission yeast *Schizosaccharomyces japonicus*. *Antonie van Leeuwenhoek*, **92**,  
553 143-154.
- 554 21. Papp, L., Sipiczki, M., Holb, I.J. and Miklos, I. (2014) Optimal conditions for mycelial  
555 growth of *Schizosaccharomyces japonicus* cells in liquid medium: it enables the  
556 molecular investigation of dimorphism. *Yeast*, **31**, 475-482.
- 557 22. Ramos Da Conceicao Neta, E.R., Johanningsmeier, S.D. and McFeeters, R.F. (2007) The  
558 chemistry and physiology of sour taste--a review. *J Food Sci*, **72**, R33-38.
- 559 23. Hagman, A., Sall, T., Compagno, C. and Piskur, J. (2013) Yeast "make-accumulate-  
560 consume" life strategy evolved as a multi-step process that predates the whole genome  
561 duplication. *PLoS One*, **8**, e68734.
- 562 24. Viana, F., Belloch, C., Valles, S. and Manzanares, P. (2011) Monitoring a mixed starter  
563 of *Hanseniaspora vineae*-*Saccharomyces cerevisiae* in natural must: impact on 2-  
564 phenylethyl acetate production. *Int J Food Microbiol*, **151**, 235-240.
- 565 25. Lleixa, J., Martin, V., Portillo Mdel, C., Carrau, F., Beltran, G. and Mas, A. (2016)  
566 Comparison of Fermentation and Wines Produced by Inoculation of *Hanseniaspora*  
567 *vineae* and *Saccharomyces cerevisiae*. *Front Microbiol*, **7**, 338.
- 568 26. Quiros, M., Rojas, V., Gonzalez, R. and Morales, P. (2014) Selection of non-  
569 *Saccharomyces* yeast strains for reducing alcohol levels in wine by sugar respiration. *Int*  
570 *J Food Microbiol*, **181**, 85-91.
- 571 27. Fleet, G.H. (2003) Yeast interactions and wine flavour. *Int J Food Microbiol*, **86**, 11-22.
- 572 28. Jolly, N.P., Varela, C. and Pretorius, I.S. (2014) Not your ordinary yeast: non-  
573 *Saccharomyces* yeasts in wine production uncovered. *FEMS Yeast Res*, **14**, 215-237.
- 574 29. Swiegers, J.H. and Pretorius, I.S. (2005) Yeast modulation of wine flavor. *Adv Appl*  
575 *Microbiol*, **57**, 131-175.
- 576 30. Lappe-Oliveras, P., Moreno-Terrazas, R., Arrizon-Gavino, J., Herrera-Suarez, T., Garcia-  
577 Mendoza, A. and Gschaedler-Mathis, A. (2008) Yeasts associated with the production of  
578 Mexican alcoholic nondistilled and distilled Agave beverages. *FEMS Yeast Res*, **8**, 1037-  
579 1052.
- 580 31. Leuck, A.M., Rothenberger, M.K. and Green, J.S. (2014) Fungemia due to *Lachancea*  
581 *fermentati*: a case report. *BMC Infect Dis*, **14**, 250.
- 582 32. Slavikova, E., Vadkertiova, R. and Vranova, D. (2007) Yeasts colonizing the leaf  
583 surfaces. *J Basic Microbiol*, **47**, 344-350.
- 584 33. Li, S.S., Cheng, C., Li, Z., Chen, J.Y., Yan, B., Han, B.Z. and Reeves, M. (2010) Yeast  
585 species associated with wine grapes in China. *Int J Food Microbiol*, **138**, 85-90.

- 586 34. Nova, M.X., Schuler, A.R., Brasileiro, B.T. and Morais, M.A., Jr. (2009) Yeast species  
587 involved in artisanal cachaca fermentation in three stills with different technological  
588 levels in Pernambuco, Brazil. *Food Microbiol*, **26**, 460-466.
- 589 35. Gulitz, A., Stadie, J., Wenning, M., Ehrmann, M.A. and Vogel, R.F. (2011) The  
590 microbial diversity of water kefir. *Int J Food Microbiol*, **151**, 284-288.
- 591 36. Maciel, N.O., Pilo, F.B., Freitas, L.F., Gomes, F.C., Johann, S., Nardi, R.M., Lachance,  
592 M.A. and Rosa, C.A. (2013) The diversity and antifungal susceptibility of the yeasts  
593 isolated from coconut water and reconstituted fruit juices in Brazil. *Int J Food Microbiol*,  
594 **160**, 201-205.
- 595 37. Friedrich, A., Jung, P.P., Hou, J., Neugeglise, C. and Schacherer, J. (2012) Comparative  
596 mitochondrial genomics within and among yeast species of the Lachancea genus. *PLoS*  
597 *One*, **7**, e47834.
- 598 38. Mousavi, F., Beheshti-Maal, K. and Massah, A. (2015) Production of Sophorolipid from  
599 an Identified Current Yeast, *Lachancea thermotolerans* BBMCZ7FA20, Isolated from  
600 Honey Bee. *Curr Microbiol*, **71**, 303-310.
- 601 39. Nguyen, N.H., Suh, S.O. and Blackwell, M. (2007) Five novel *Candida* species in insect-  
602 associated yeast clades isolated from Neuroptera and other insects. *Mycologia*, **99**, 842-  
603 858.
- 604 40. Limtong, S., Kaewwichian, R., Yongmanitchai, W. and Kawasaki, H. (2014) Diversity of  
605 culturable yeasts in phylloplane of sugarcane in Thailand and their capability to produce  
606 indole-3-acetic acid. *World J Microbiol Biotechnol*, **30**, 1785-1796.
- 607 41. Shekhawat, K., Bauer, F.F. and Setati, M.E. (2016) Impact of oxygenation on the  
608 performance of three non-*Saccharomyces* yeasts in co-fermentation with *Saccharomyces*  
609 *cerevisiae*. *Appl Microbiol Biotechnol*.
- 610 42. Benito, A., Calderon, F., Palomero, F. and Benito, S. (2016) Quality and Composition of  
611 Airen Wines Fermented by Sequential Inoculation of *Lachancea thermotolerans* and  
612 *Saccharomyces cerevisiae*. *Food Technol Biotechnol*, **54**, 135-144.
- 613 43. Fantes, P.A. and Hoffman, C.S. (2016) A Brief History of *Schizosaccharomyces pombe*  
614 Research: A Perspective Over the Past 70 Years. *Genetics*, **203**, 621-629.
- 615 44. Yukawa, M. and Maki, T. (1931) Regarding the new fission yeast *Schizosaccharomyces*  
616 *Japonicus*. *Kyushu Daigaku Kiyou (Japanese)* 218-226.
- 617 45. Hedges, S.B. (2002) The origin and evolution of model organisms. *Nat Rev Genet*, **3**,  
618 838-849.
- 619 46. Josephsen, J. and Jespersen, L. (2004) In Y. H. Hui, L. M.-G., Ase Solvejg Hansen, Jytte  
620 Josephsen, Wai-Kit Nip, Peggy S. Stanfield, and Fidel Toldra (ed.), *Handbook of Food*  
621 *and Beverage Fermentation Technology (Food Science & Technology)*. CRC Press, pp.  
622 27-58.
- 623 47. Lambrechts, M.G. and Pretorius, I.S. (2000) Yeast and its Importance to Wine Aroma - A  
624 Review. *South African Journal for Enology and Viticulture*, **21**, 97-129.
- 625 48. Woodward, B. (2013), *Haw River Farmhouse Ales*. Blogger,  
626 <http://hawriverales.blogspot.com/2013/01/the-beast-from-yeast-bears-fruit.html>, Vol.  
627 2017.
- 628 49. Bourdichon, F., Casaregola, S., Farrokh, C., Frisvad, J.C., Gerds, M.L., Hammes, W.P.,  
629 Harnett, J., Huys, G., Laulund, S., Ouwehand, A. *et al.* (2012) Food fermentations:  
630 microorganisms with technological beneficial use. *Int J Food Microbiol*, **154**, 87-97.

- 631 50. Laitila, A., Sarlin, T., Raulio, M., Wilhelmson, A., Kotaviita, E., Huttunen, T. and  
632 Juvonen, R. (2011) Yeasts in malting, with special emphasis on *Wickerhamomyces*  
633 *anomalus* (synonym *Pichia anomala*). *Antonie van Leeuwenhoek*, **99**, 75-84.
- 634 51. Timke, M., Wang-Lieu, N.Q., Altendorf, K. and Lipski, A. (2008) Identity, beer spoiling  
635 and biofilm forming potential of yeasts from beer bottling plant associated biofilms.  
636 *Antonie van Leeuwenhoek*, **93**, 151-161.
- 637 52. Masoud, W. and Jespersen, L. (2006) Pectin degrading enzymes in yeasts involved in  
638 fermentation of *Coffea arabica* in East Africa. *Int J Food Microbiol*, **110**, 291-296.
- 639 53. Satora, P., Tarko, T., Sroka, P. and Blaszczyk, U. (2014) The influence of  
640 *Wickerhamomyces anomalus* killer yeast on the fermentation and chemical composition  
641 of apple wines. *FEMS Yeast Res*, **14**, 729-740.
- 642 54. Ye, M., Yue, T. and Yuan, Y. (2014) Effects of sequential mixed cultures of  
643 *Wickerhamomyces anomalus* and *Saccharomyces cerevisiae* on apple cider fermentation.  
644 *FEMS Yeast Res*, **14**, 873-882.
- 645 55. Groenewald, M., Robert, V. and Smith, M.T. (2011) Five novel *Wickerhamomyces*- and  
646 *Metschnikowia*-related yeast species, *Wickerhamomyces chaumierensis* sp. nov.,  
647 *Candida pseudofloscolorum* sp. nov., *Candida danieliae* sp. nov., *Candida robnettieae* sp.  
648 nov. and *Candida eppingiae* sp. nov., isolated from plants. *Int J Syst Evol Microbiol*, **61**,  
649 2015-2022.
- 650 56. Hazelwood, L.A., Walsh, M.C., Pronk, J.T. and Daran, J.M. (2010) Involvement of  
651 vacuolar sequestration and active transport in tolerance of *Saccharomyces cerevisiae* to  
652 hop iso-alpha-acids. *Applied and environmental microbiology*, **76**, 318-328.
- 653 57. Garcia, D.M., Dietrich, D., Clardy, J. and Jarosz, D.F. (2016) A common bacterial  
654 metabolite elicits prion-based bypass of glucose repression. *Elife*, **5**.
- 655 58. Jarosz, D.F., Brown, J.C., Walker, G.A., Datta, M.S., Ung, W.L., Lancaster, A.K.,  
656 Rotem, A., Chang, A., Newby, G.A., Weitz, D.A. *et al.* (2014) Cross-kingdom chemical  
657 communication drives a heritable, mutually beneficial prion-based transformation of  
658 metabolism. *Cell*, **158**, 1083-1093.

659

660 **Tables**

661 **Table 1.** Wild yeast species diversity and number of isolates.

| <b>Genus</b>         | <b>Species</b>         | <b>Isolates</b>   |
|----------------------|------------------------|-------------------|
| <i>Aureobasidium</i> | <i>pullulans</i>       | 2                 |
| <i>Brettanomyces</i> | <i>bruxellensis</i>    | 7                 |
| <i>Candida</i>       | <i>carphophila</i>     | 1                 |
|                      | <i>intermedia</i>      | 1                 |
|                      | <i>sake</i>            | 2                 |
|                      | <i>tropicalis</i>      | 6                 |
|                      | <i>zemplanina</i>      | 1                 |
|                      | <i>zeylandoides</i>    | 1                 |
|                      | <i>Clavispora</i>      | <i>lusitaniae</i> |
| <i>Cryptococcus</i>  | <i>albidus</i>         | 1                 |
| <i>Cyberlindnera</i> | <i>fabianii</i>        | 5                 |
|                      | <i>rhodanensis</i>     | 1                 |
| <i>Debaryomyces</i>  | <i>hansenii</i>        | 7                 |
| <i>Hanseniaspora</i> | <i>opuntiae</i>        | 1                 |
|                      | <i>uvarum</i>          | 12                |
|                      | <i>valbyensis</i>      | 1                 |
|                      | <i>vineae</i>          | 11                |
|                      | <i>orientalis</i>      | 1                 |
| <i>Issatchenkia</i>  | <i>orientalis</i>      | 1                 |
|                      | <i>terricola</i>       | 3                 |
| <i>Kazachstania</i>  | <i>unisporea</i>       | 1                 |
| <i>Kluyveromyces</i> | <i>lactis</i>          | 10                |
|                      | <i>marxianus</i>       | 10                |
| <i>Kodamaea</i>      | <i>ohmeri</i>          | 2                 |
| <i>Kwoniella</i>     | <i>mangroviensis</i>   | 1                 |
| <i>Lachancea</i>     | <i>fermentati</i>      | 8                 |
|                      | <i>kluyveri</i>        | 4                 |
|                      | <i>thermotolerans</i>  | 25                |
| <i>Metchnikowia</i>  | <i>fruiticola</i>      | 1                 |
|                      | <i>pulcherrima</i>     | 1                 |
| <i>Meyerozyma</i>    | <i>guilliermondii</i>  | 4                 |
| <i>Ogatea</i>        | <i>naganishii</i>      | 1                 |
| <i>Pichia</i>        | <i>fermentans</i>      | 3                 |
|                      | <i>galeiformis</i>     | 12                |
|                      | <i>guilliermondii</i>  | 2                 |
|                      | <i>kluyveri</i>        | 7                 |
|                      | <i>kudriavzevii</i>    | 9                 |
|                      | <i>manshurica</i>      | 4                 |
|                      | <i>membranifaciens</i> | 5                 |
|                      | <i>mexicana</i>        | 2                 |
|                      | <i>nakazawae</i>       | 2                 |

|                            |                     |    |
|----------------------------|---------------------|----|
|                            | <i>quercuum</i>     | 1  |
| <i>Rhodospodium</i>        | <i>babjevae</i>     | 1  |
|                            | <i>diobovatum</i>   | 1  |
| <i>Rhodotorula</i>         | <i>mucilaginosa</i> | 1  |
| <i>Saccharomyces</i>       | <i>cerevisiae</i>   | 37 |
|                            | <i>kudriavzevii</i> | 1  |
|                            | <i>paradoxus</i>    | 8  |
| <i>Schizosaccharomyces</i> | <i>japonicus</i>    | 2  |
|                            | <i>pombe</i>        | 4  |
| <i>Starmerella</i>         | <i>bacillaris</i>   | 2  |
|                            | <i>bombicola</i>    | 3  |
| <i>Torulaspora</i>         | <i>delbrueckii</i>  | 24 |
| <i>Wickerhamomyces</i>     | <i>anomalus</i>     | 17 |
| <i>Williopsis</i>          | <i>saturnus</i>     | 1  |

---

662

663

664 **Table 2. Lab-scale fermentation and sensory results for representative heterofermentative**  
 665 **strains.** The highlighted strains were used in Figures 2 and/or 3.

| Strain | Species <sup>a</sup>     | Attenuation <sup>b</sup> | Final pH <sup>c</sup> | Sensory notes                                                            |
|--------|--------------------------|--------------------------|-----------------------|--------------------------------------------------------------------------|
| WYP39  | <i>L. fermentati</i>     | 60%                      | 3.68                  | Sour, pear, melon, black tea                                             |
| YH25   | <i>L. fermentati</i>     | 60%                      | 3.66                  | Lactic tart finish                                                       |
| YH26   | <i>L. thermotolerans</i> | 60%                      | 3.35                  | Very tart, peach, citrus zest                                            |
| YH27   | <i>L. thermotolerans</i> | 40%                      | 3.42                  | Tart green apple, clean                                                  |
| YH72   | <i>H. vineae</i>         | 75%                      | 3.26                  | Slightly sour, clean, tart fruit, apple cider, quaffable                 |
| YH73   | <i>L. thermotolerans</i> | 55%                      | 3.36                  | Very sour, berries                                                       |
| YH77   | <i>L. fermentati</i>     | 60%                      | 3.55                  | Tart, clean, pear                                                        |
| YH79   | <i>L. thermotolerans</i> | 50%                      | 3.42                  | Slightly tart, clean, rounded                                            |
| YH81   | <i>L. thermotolerans</i> | 55%                      | 3.21                  | Tart, fruity, citrus, pear, blood orange                                 |
| YH82   | <i>W. anomalous</i>      | 83%                      | 3.24                  | Slightly sour, fruity, clean, aromatic, tart fruit, reminiscent of perry |
| YH109  | <i>L. thermotolerans</i> | 55%                      | 3.39                  | Very sour, clean                                                         |
| YH140  | <i>L. thermotolerans</i> | 50%                      | 3.26                  | Sour, clean, balanced, tea flavors                                       |
| YH156  | <i>S. japonicus</i>      | 72%                      | 3.88                  | Sour, fruity, green apple Jolly Rancher                                  |

666 <sup>a</sup> The genus abbreviations are: *L.*, *Lachancea*; *H.*, *Hanseniaspora*; *W.*, *Wickerhamomyces*; and *S.*,  
 667 *Schizosaccharomyces*.

668 <sup>b</sup> The reported attenuation is based on several trial fermentations in various worts.

669 <sup>c</sup> The initial pH was 5.0.

670

671 **Table 3. Large-scale fermentation data for select heterofermentative yeasts.**

| <b>Strain</b>      | <b>Lag time</b> | <b>FG<sup>b</sup></b> | <b>Final pH<sup>c</sup></b> | <b>Flocculation</b> | <b>Sensory</b>                            |
|--------------------|-----------------|-----------------------|-----------------------------|---------------------|-------------------------------------------|
| WYP39 <sup>a</sup> | 6 h             | 0.099                 | 3.74                        | Medium              | Tart, dry, light pineapple & mango        |
| YH72               | 14 h            | 1.000                 | 3.23                        | Medium              | Very sour, stone fruit flavors            |
| YH82               | 13 h            | 1.001                 | 3.36                        | Medium              | Very sour, pear, apple, and apricot       |
| YH156              | 14 h            | 0.099                 | 3.20                        | High                | Sour, intense stone fruit aroma & flavors |

672 <sup>a</sup> WYP39 = *Lachancea fermentati*, YH72 = *Hanseniaspora vineae*, YH82 = *Wickerhamomyces*  
673 *anomalus*, and YH156 = *Schizosaccharomyces japonicus*.

674 <sup>b</sup> FG, final gravity; original gravity = 1.046 for all fermentations.

675 <sup>c</sup> The starting pH was 5.35 for all fermentations.

676 **Figure Legends**

677

678 **Figure 1. Evolutionary relationships among the wild strains and a commercially available**

679 **ale yeast.** The D1/D2 rDNA sequences of the indicated strains were aligned, and the

680 phylogenetic relationships among them were drawn as a rooted N-J tree using

681 *Schizosaccharomyces pombe* as the outgroup. From top to bottom, the *S. japonicas* strains are

682 highlighted purple, the *W. anomalus* strains are red, the *H. vineae* strains are green, the *L.*

683 *fermentati* strains are dark blue, and the *L. thermotolerans* strains are light blue. *S. cerevisiae*

684 strain WLP001 is not highlighted and occupies the relative midpoint of the phylogenetic tree.

685 **Figure 2. Colony and cell morphology of the indicated yeast strains.** A) *H. vineae* (YH72), *L.*

686 *fermentati* (WYP39), *L. thermotolerans* (YH140), *S. japonicus* (YH156), and *W. anomalus*

687 (YH82) colony morphology on YPD agar (middle) and WLN agar (right). *S. cerevisiae* strain

688 YH166 was included for comparison. (B-G) Light micrographs of *H. vineae*, *L. fermentati*, *L.*

689 *thermotolerans*, *S. japonicus*, and *W. anomalus* (respectively) taken by differential interference

690 contrast imaging. The black arrow in (F) indicates a probable microhyphae. Magnification =

691 1000x.

692 **Figure 3. Lactic acid production.** A) LASSO assay for lactic acid production by the indicated

693 strains. Cells producing lactic acid develop a dark halo. Images of both the top and bottom of a

694 representative LASSO plate are shown. *S. cerevisiae* WLP001 and LAB (*L. plantarum*) were

695 included as negative and positive controls for lactic acid production, respectively. These results

696 are indicative of three independent experiments using the same strains. B) Multi-well plate assay

697 for lactic acid production. Cell growth medium containing lactic acid turns from gold to green

698 when the enzymatic assay is complete. Multiple strains of *L. thermotolerans*, *L. fermentati*, *H.*



699 *vineae*, and LAB were tested, as well as *S. japonicus* YH156 (*Sj*), *W. anomalus* YH82 (*Wa*), *S.*  
700 *cerevisiae* WLP001, and *Escherichia coli* DH5 $\alpha$  (*E. coli*). WLP001 and *E. coli* served as  
701 negative controls for lactic acid production by yeast and bacteria, respectively. *L. plantarum* (left  
702 LAB well) and *L. brevis* (right LAB well) were used as positive controls for lactic acid  
703 production. C) L-lactate quantification. Typical GC-MS spectra of the lactate standard (solid red  
704 line) and isolated lactate from beer samples are shown. HV (solid purple line), WA (solid green  
705 line), LF (dashed burnt sienna line), and SJ (dashed black line) represent beers fermented with *H.*  
706 *vineae* YH72, *W. anomalus* YH82, *L. fermentati* WYP39, and *S. japonicus* YH156, respectively.  
707 “Caul” (solid black line) represents the lactate isolated from Cauldron, a positive control for  
708 lactate in beer (See Section 2.6 and (17)).

709 **Figure 4. Comparison of kettle souring, wood-aged souring, and primary souring.** See the  
710 text in Section 4.6 for details.

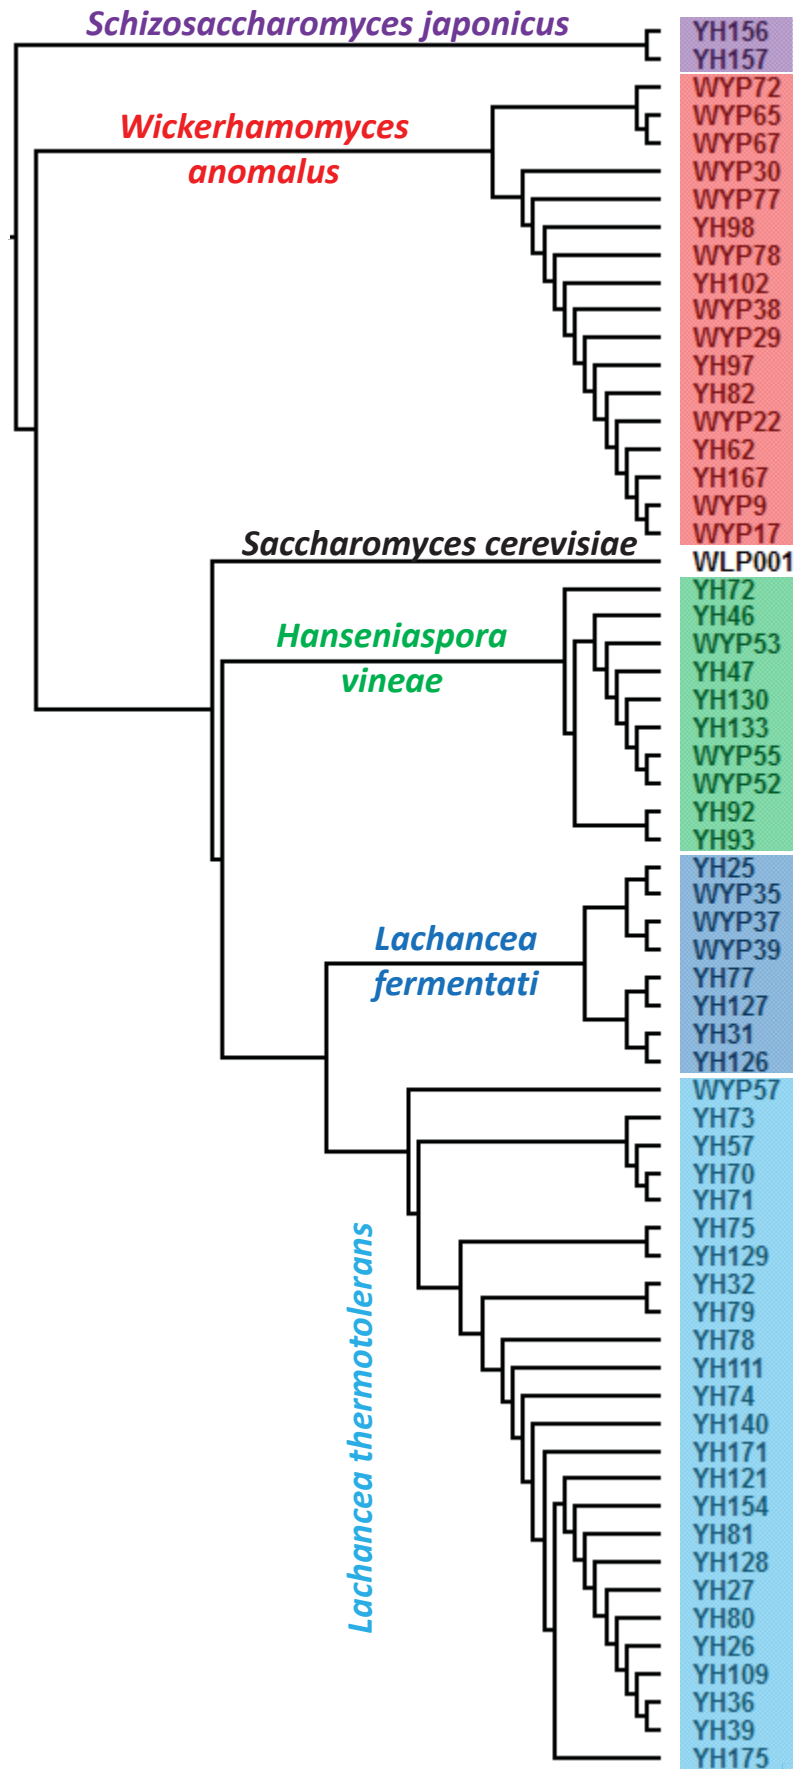

Figure 1

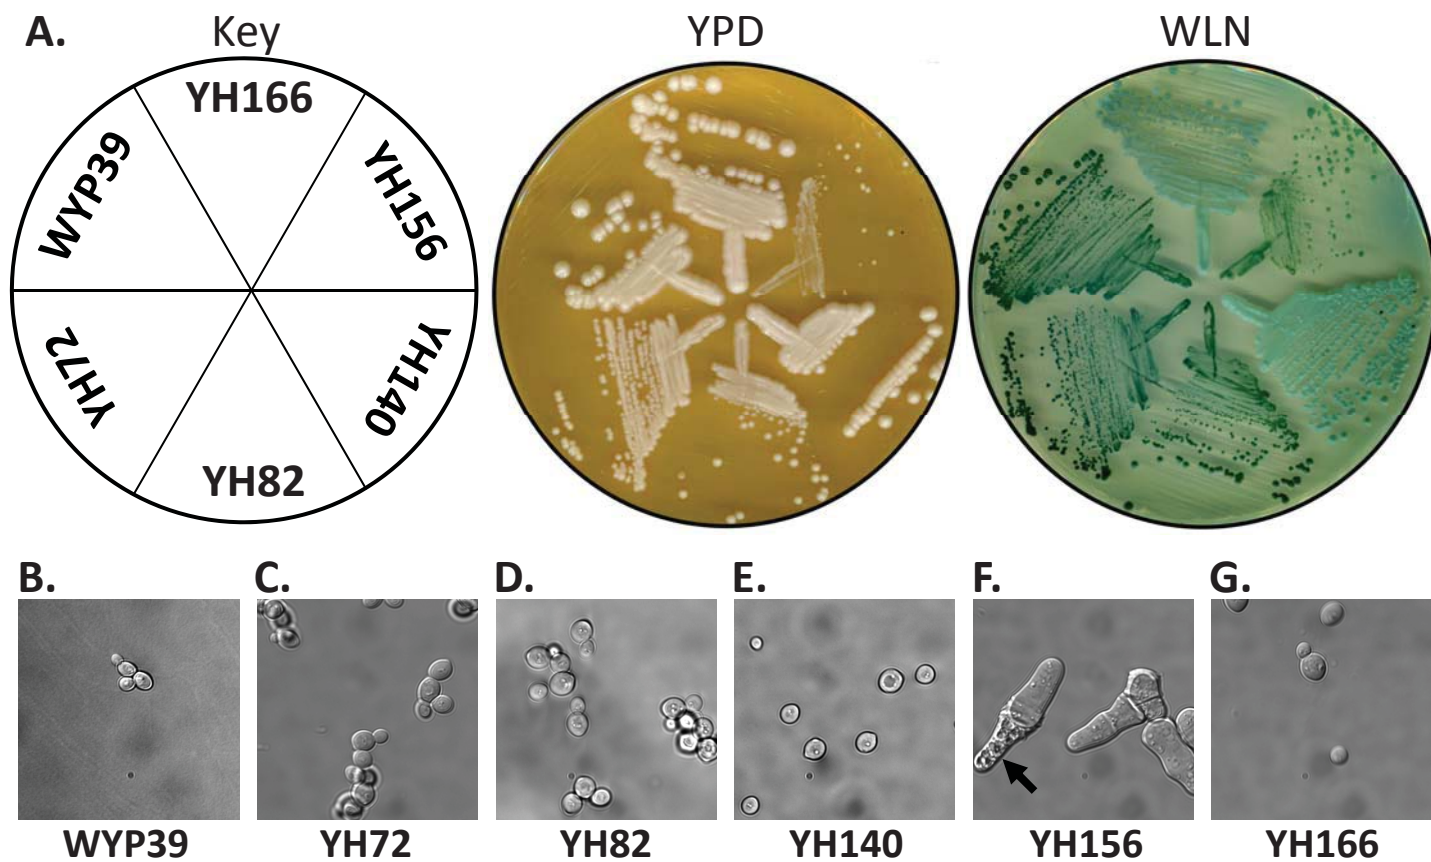

Figure 2

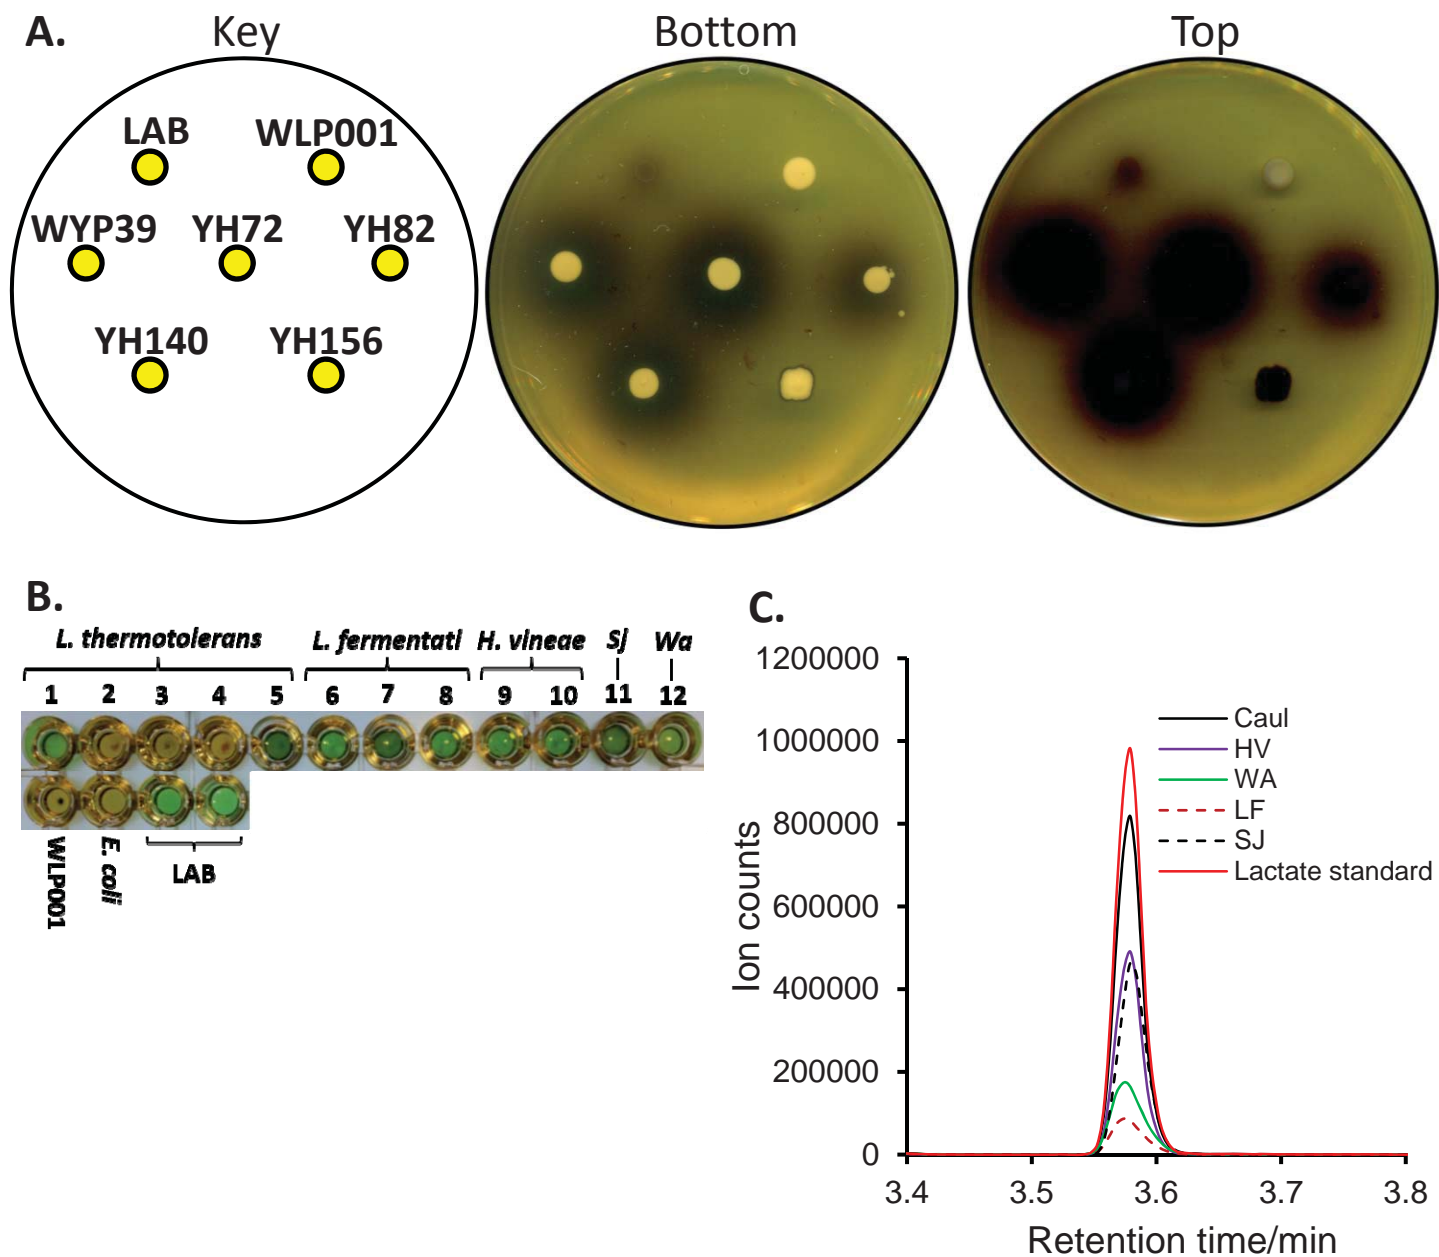

Figure 3

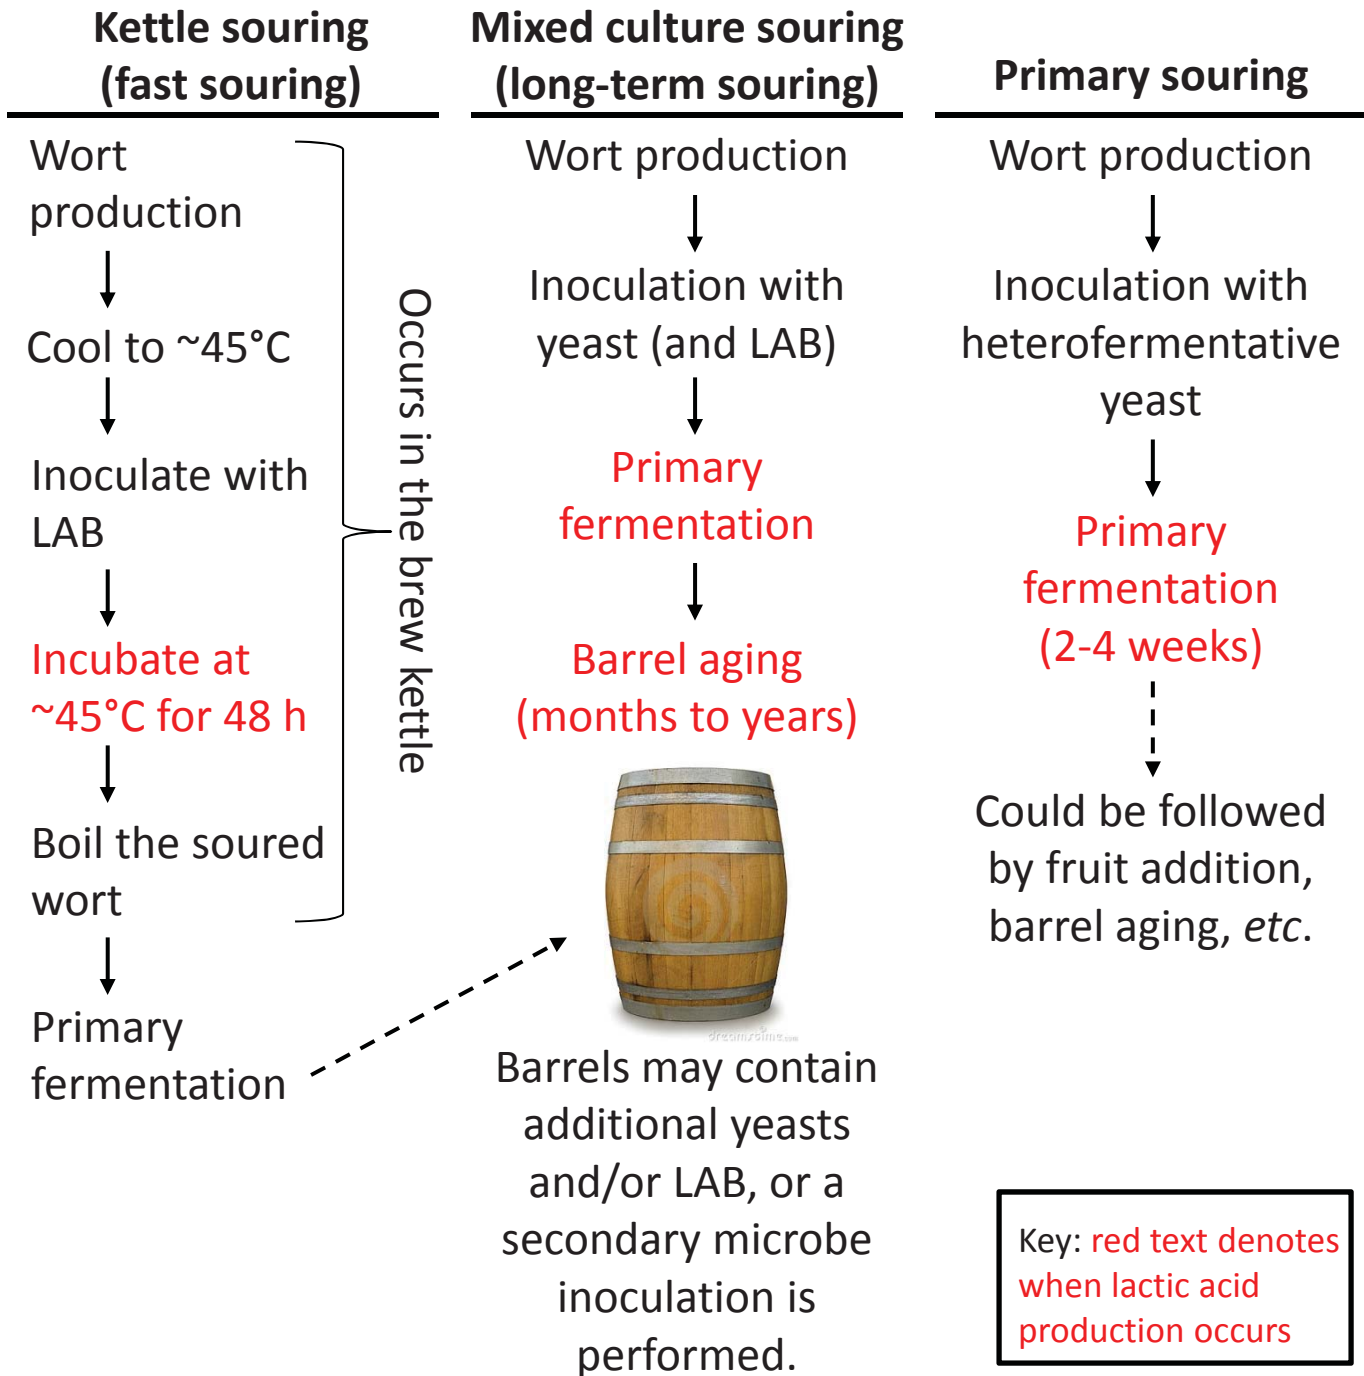

Figure 4
